# Supplementary material
Source: PubMed Central journal article supplement (PMC6488380)

## SUPPLEMENTAL MATERIAL

**Supplemental Table 1:** Total mortality According to Type of Sugar Sweetened Beverage (SSB) based on pooled data from the Nurses' Health Study (NHS) and Health Professionals Follow-up Study (HPFS)

|                                               | SSB Category |                   |                   |                   |                   | P trend | HR (95% CI)<br>per 1 serving<br>per day |
|-----------------------------------------------|--------------|-------------------|-------------------|-------------------|-------------------|---------|-----------------------------------------|
|                                               | <1/mo        | 1-4/mo            | 2-6/wk            | 1 to <2/d         | ≥ 2/d             |         |                                         |
| <b>Carbonated cola sweetened beverage</b>     |              |                   |                   |                   |                   |         |                                         |
| Number of cases                               | 24511        | 6040              | 4413              | 971               | 501               |         |                                         |
| Person years                                  | 2186676      | 642098            | 429527            | 102647            | 54616             |         |                                         |
| Age-adjusted model                            | 1.0          | 1.11 (1.07, 1.14) | 1.22 (1.18, 1.26) | 1.48 (1.38, 1.58) | 1.81 (1.66, 1.98) | <0.0001 | 1.24 (1.22, 1.27)                       |
| Multivariate model 1                          | 1.0          | 1.05 (1.02, 1.08) | 1.11 (1.07, 1.15) | 1.18 (1.11, 1.26) | 1.31 (1.20, 1.43) | <0.0001 | 1.10 (1.07, 1.13)                       |
| Multivariate model 2                          | 1.0          | 1.02 (0.99, 1.05) | 1.06 (1.03, 1.10) | 1.12 (1.05, 1.19) | 1.23 (1.12, 1.34) | <0.0001 | 1.07 (1.04, 1.10)                       |
| <b>Non-cola carbonated sweetened beverage</b> |              |                   |                   |                   |                   |         |                                         |
| Number of cases                               | 27652        | 5864              | 2469              | 339               | 112               |         |                                         |
| Person years                                  | 2505009      | 655386            | 218586            | 27960             | 8621              |         |                                         |
| Age-adjusted model                            | 1.0          | 1.01 (0.98, 1.04) | 1.12 (1.07, 1.18) | 1.29 (1.15, 1.44) | 1.57 (1.30, 1.90) | <0.0001 | 1.22 (1.17, 1.28)                       |
| Multivariate model 1                          | 1.0          | 0.99 (0.96, 1.02) | 1.08 (1.03, 1.13) | 1.10 (0.99, 1.22) | 1.24 (1.03, 1.49) | <0.0001 | 1.11 (1.06, 1.17)                       |
| Multivariate model 2                          | 1.0          | 0.98 (0.95, 1.01) | 1.06 (1.02, 1.11) | 1.06 (0.95, 1.18) | 1.17 (0.97, 1.41) | 0.0007  | 1.08 (1.03, 1.13)                       |
| <b>Non-carbonated sweetened beverage</b>      |              |                   |                   |                   |                   |         |                                         |
| Number of cases                               | 24671        | 6827              | 3690              | 819               | 429               |         |                                         |
| Person years                                  | 2220437      | 745819            | 343040            | 70813             | 35452             |         |                                         |
| Age-adjusted model                            | 1.0          | 0.92 (0.90, 0.95) | 0.94 (0.91, 0.97) | 1.05 (0.98, 1.12) | 1.14 (1.03, 1.25) | 0.01    | 1.05 (1.02, 1.08)                       |
| Multivariate model 1                          | 1.0          | 1.02 (1.00, 1.05) | 1.05 (1.01, 1.09) | 1.15 (1.07, 1.23) | 1.21 (1.10, 1.33) | <0.0001 | 1.09 (1.06, 1.12)                       |
| Multivariate model 2                          | 1.0          | 1.01 (0.98, 1.04) | 1.04 (1.00, 1.08) | 1.13 (1.05, 1.21) | 1.17 (1.06, 1.29) | <0.0001 | 1.07 (1.04, 1.10)                       |

Multivariate model 1: adjusted for: age, ASB, smoking, alcohol intake, postmenopausal hormone use (NHS), physical activity, family

history of diabetes, family history of mi, family history of cancer, multivitamin use, ethnicity, aspirin use.

Multivariate model 2: further adjusted for baseline history of hypertension and hypercholesterolemia, intakes of whole grains, fruit, vegetables, red and processed meat, ASB, total energy and BMI. Models were mutually adjusted for different types of SSBs.

**Supplemental Table 2:** Total and Cause-specific Mortality According to Intake of Artificially Sweetened Beverages (ASB) at higher levels based on data of the Nurses' Health Study (NHS) and Health Professionals Follow-up study (HPFS)

|                        | ASB Category |                   |                   |                   |                   |                   | P trend |
|------------------------|--------------|-------------------|-------------------|-------------------|-------------------|-------------------|---------|
|                        | <1/mo        | 1-4/mo            | 2-6/wk            | 1 to <2/d         | 2 to <4/d         | ≥ 4/d             |         |
| <b>Total Mortality</b> |              |                   |                   |                   |                   |                   |         |
| <b>NHS</b>             |              |                   |                   |                   |                   |                   |         |
| Number of cases        | 12561        | 3550              | 3981              | 1858              | 1195              | 287               |         |
| Person years           | 1122996      | 408370            | 514864            | 260369            | 163599            | 32009             |         |
| Age-adjusted model     | 1.0          | 0.88 (0.85, 0.92) | 0.91 (0.88, 0.94) | 1.04 (0.99, 1.09) | 1.25 (1.18, 1.33) | 1.82 (1.62, 2.04) | <0.0001 |
| Multivariate model 1   | 1.0          | 0.98 (0.94, 1.02) | 0.98 (0.95, 1.02) | 1.03 (0.98, 1.09) | 1.15 (1.09, 1.22) | 1.45 (1.29, 1.63) | <0.0001 |
| Multivariate model 2   | 1.0          | 0.96 (0.93, 1.00) | 0.94 (0.91, 0.98) | 0.97 (0.93, 1.02) | 1.06 (1.00, 1.13) | 1.30 (1.15, 1.46) | 0.0001  |
| <b>HPFS</b>            |              |                   |                   |                   |                   |                   |         |
| Number of cases        | 7037         | 1431              | 3059              | 866               | 493               | 118               |         |
| Person Years           | 434859       | 96830             | 231310            | 82933             | 54966             | 12458             |         |
| Age-adjusted model     | 1.0          | 0.91 (0.86, 0.96) | 0.98 (0.94, 1.02) | 1.04 (0.97, 1.12) | 1.09 (0.99, 1.19) | 1.42 (1.18, 1.70) | <0.0001 |
| Multivariate model 1   | 1.0          | 0.95 (0.90, 1.01) | 1.02 (0.98, 1.06) | 1.05 (0.97, 1.12) | 1.04 (0.95, 1.14) | 1.26 (1.05, 1.51) | 0.01    |
| Multivariate model 2   | 1.0          | 0.95 (0.89, 1.00) | 1.00 (0.95, 1.04) | 0.98 (0.91, 1.06) | 0.96 (0.87, 1.05) | 1.11 (0.93, 1.34) | 0.81    |
| <b>Pooled</b>          |              |                   |                   |                   |                   |                   |         |
| Age-adjusted model     | 1.0          | 0.89 (0.86, 0.91) | 0.94 (0.91, 0.97) | 1.04 (1.00, 1.08) | 1.20 (1.14, 1.26) | 1.68 (1.52, 1.85) | <0.0001 |
| Multivariate model 1   | 1.0          | 0.97 (0.94, 1.00) | 1.00 (0.97, 1.03) | 1.04 (1.00, 1.08) | 1.12 (1.06, 1.18) | 1.38 (1.25, 1.52) | <0.0001 |
| Multivariate model 2   | 1.0          | 0.96 (0.93, 0.99) | 0.97 (0.95, 1.00) | 0.98 (0.94, 1.03) | 1.04 (0.99, 1.09) | 1.25 (1.13, 1.38) | 0.0002  |
| <b>CVD Mortality</b>   |              |                   |                   |                   |                   |                   |         |
| <b>NHS</b>             |              |                   |                   |                   |                   |                   |         |
| Number of cases        | 2222         | 613               | 691               | 331               | 225               | 57                |         |
| Age-adjusted model     | 1.0          | 0.87 (0.79, 0.95) | 0.92 (0.84, 1.00) | 1.10 (0.98, 1.24) | 1.48 (1.28, 1.70) | 2.33 (1.79, 3.04) | <0.0001 |
| Multivariate model 1   | 1.0          | 0.96 (0.87, 1.05) | 0.99 (0.91, 1.08) | 1.09 (0.97, 1.23) | 1.33 (1.16, 1.53) | 1.79 (1.37, 2.33) | <0.0001 |
| Multivariate model 2   | 1.0          | 0.90 (0.82, 0.99) | 0.89 (0.82, 0.98) | 0.95 (0.84, 1.07) | 1.09 (0.95, 1.26) | 1.43 (1.10, 1.87) | 0.02    |
| <b>HPFS</b>            |              |                   |                   |                   |                   |                   |         |
| Number of cases        | 1975         | 436               | 882               | 280               | 149               | 35                |         |
| Age-adjusted model     | 1.0          | 0.97 (0.88, 1.08) | 1.03 (0.95, 1.12) | 1.28 (1.13, 1.45) | 1.30 (1.09, 1.53) | 1.75 (1.25, 2.45) | <0.0001 |
| Multivariate model 1   | 1.0          | 1.01 (0.91, 1.12) | 1.06 (0.97, 1.14) | 1.27 (1.12, 1.45) | 1.21 (1.03, 1.44) | 1.55 (1.11, 2.17) | <0.0001 |

|                         |      |                   |                   |                   |                   |                   |         |
|-------------------------|------|-------------------|-------------------|-------------------|-------------------|-------------------|---------|
| Multivariate model 2    | 1.0  | 0.97 (0.87, 1.08) | 0.99 (0.91, 1.07) | 1.11 (0.97, 1.26) | 1.03 (0.86, 1.22) | 1.21 (0.86, 1.70) | 0.23    |
| <b>Pooled</b>           |      |                   |                   |                   |                   |                   |         |
| Age-adjusted model      | 1.0  | 0.91 (0.85, 0.97) | 0.98 (0.92, 1.03) | 1.18 (1.08, 1.29) | 1.40 (1.26, 1.56) | 2.07 (1.68, 2.55) | <0.0001 |
| Multivariate model 1    | 1.0  | 0.98 (0.91, 1.05) | 1.02 (0.97, 1.09) | 1.17 (1.07, 1.27) | 1.28 (1.15, 1.43) | 1.69 (1.37, 2.08) | <0.0001 |
| Multivariate model 2    | 1.0  | 0.93 (0.87, 1.00) | 0.95 (0.89, 1.00) | 1.02 (0.94, 1.12) | 1.08 (0.97, 1.21) | 1.37 (1.11, 1.69) | 0.004   |
| <b>Cancer Mortality</b> |      |                   |                   |                   |                   |                   |         |
| <b>NHS</b>              |      |                   |                   |                   |                   |                   |         |
| Number of cases         | 4154 | 1334              | 1520              | 730               | 478               | 102               |         |
| Age-adjusted model      | 1.0  | 0.93 (0.87, 0.99) | 0.91 (0.86, 0.97) | 1.01 (0.93, 1.09) | 1.17 (1.06, 1.29) | 1.41 (1.15, 1.71) | <0.0001 |
| Multivariate model 1    | 1.0  | 1.03 (0.97, 1.09) | 0.99 (0.93, 1.05) | 1.04 (0.96, 1.12) | 1.11 (1.01, 1.23) | 1.21 (0.99, 1.47) | 0.02    |
| Multivariate model 2    | 1.0  | 1.00 (0.94, 1.07) | 0.95 (0.89, 1.01) | 0.98 (0.91, 1.06) | 1.04 (0.94, 1.15) | 1.12 (0.92, 1.37) | 0.34    |
| <b>HPFS</b>             |      |                   |                   |                   |                   |                   |         |
| Number of cases         | 2118 | 469               | 996               | 283               | 158               | 38                |         |
| Age-adjusted model      | 1.0  | 0.99 (0.89, 1.09) | 1.01 (0.93, 1.09) | 1.01 (0.89, 1.15) | 1.01 (0.85, 1.18) | 1.27 (0.92, 1.75) | 0.34    |
| Multivariate model 1    | 1.0  | 1.02 (0.92, 1.13) | 1.05 (0.97, 1.13) | 1.03 (0.91, 1.17) | 0.98 (0.83, 1.16) | 1.16 (0.84, 1.60) | 0.68    |
| Multivariate model 2    | 1.0  | 1.01 (0.92, 1.12) | 1.03 (0.95, 1.11) | 0.99 (0.87, 1.13) | 0.93 (0.79, 1.10) | 1.06 (0.76, 1.46) | 0.65    |
| <b>Pooled</b>           |      |                   |                   |                   |                   |                   |         |
| Age-adjusted model      | 1.0  | 0.94 (0.89, 0.99) | 0.95 (0.90, 0.99) | 1.01 (0.95, 1.08) | 1.13 (1.04, 1.22) | 1.37 (1.16, 1.62) | <0.0001 |
| Multivariate model 1    | 1.0  | 1.03 (0.97, 1.08) | 1.01 (0.97, 1.06) | 1.04 (0.97, 1.11) | 1.08 (0.99, 1.17) | 1.19 (1.01, 1.41) | 0.02    |
| Multivariate model 2    | 1.0  | 1.01 (0.96, 1.07) | 0.99 (0.94, 1.04) | 1.00 (0.93, 1.07) | 1.02 (0.94, 1.11) | 1.12 (0.95, 1.33) | 0.38    |

Multivariate model 1: adjusted for: age, smoking, alcohol intake, postmenopausal hormone use (NHS), physical activity, family

history of diabetes, family history of myocardial infarction, family history of cancer, multivitamin use, ethnicity, aspirin use.

Multivariate model 2: further adjusted for baseline history of hypertension and hypercholesterolemia, intakes of whole grains, fruit, vegetables, red and processed meat, total energy and body mass index. All models adjusted for sugar-sweetened beverages.

**Supplemental Table 3:** Sensitivity Analysis for Total and Cause-specific Mortality According to Intake of Sugar- Sweetened Beverages (SSB) and Artificially Sweetened Beverages (ASB) based on pooled data from the Nurses' Health Study (NHS) and Health Professionals Follow-up study (HPFS)

|                                                                           | Category |                   |                   |                   |                   | P trend | HR (95% CI) per 1 serving per day increment |
|---------------------------------------------------------------------------|----------|-------------------|-------------------|-------------------|-------------------|---------|---------------------------------------------|
|                                                                           | <1/mo    | 1-4/mo            | 2-6/wk            | 1 to <2/d         | ≥ 2/d             |         |                                             |
| <b>SSB</b>                                                                |          |                   |                   |                   |                   |         |                                             |
| <b>Simple update without stopping updating diet with chronic diseases</b> |          |                   |                   |                   |                   |         |                                             |
| All-cause Mortality                                                       | 1.0      | 1.00 (0.97, 1.03) | 1.04 (1.02, 1.07) | 1.14 (1.09, 1.20) | 1.22 (1.14, 1.30) | <0.0001 | 1.08 (1.06, 1.10)                           |
| CVD Mortality                                                             | 1.0      | 0.98 (0.93, 1.05) | 1.01 (0.95, 1.07) | 1.08 (0.97, 1.20) | 1.15 (0.99, 1.33) | 0.01    | 1.07 (1.03, 1.12)                           |
| Cancer Mortality                                                          | 1.0      | 1.06 (1.01, 1.11) | 1.10 (1.05, 1.15) | 1.12 (1.03, 1.22) | 1.26 (1.13, 1.40) | <0.0001 | 1.07 (1.04, 1.11)                           |
| <b>Cumulative Average Intake</b>                                          |          |                   |                   |                   |                   |         |                                             |
| All-cause Mortality                                                       | 1.0      | 0.96 (0.94, 0.99) | 0.99 (0.96, 1.02) | 1.08 (1.03, 1.13) | 1.19 (1.10, 1.28) | <0.0001 | 1.07 (1.05, 1.09)                           |
| CVD Mortality                                                             | 1.0      | 1.00 (0.94, 1.06) | 1.00 (0.95, 1.06) | 1.09 (0.98, 1.21) | 1.29 (1.10, 1.52) | 0.0005  | 1.10 (1.06, 1.15)                           |
| Cancer Mortality                                                          | 1.0      | 0.93 (0.89, 0.98) | 0.97 (0.93, 1.01) | 1.06 (0.97, 1.15) | 1.03 (0.90, 1.17) | 0.04    | 1.03 (1.00, 1.07)                           |
| <b>Baseline Intake</b>                                                    |          |                   |                   |                   |                   |         |                                             |
| All-cause Mortality                                                       | 1.0      | 0.96 (0.94, 0.99) | 1.00 (0.98, 1.03) | 1.06 (1.01, 1.10) | 1.15 (1.09, 1.22) | <0.0001 | 1.05 (1.03, 1.07)                           |
| CVD Mortality                                                             | 1.0      | 1.03 (0.97, 1.09) | 1.03 (0.97, 1.09) | 1.15 (1.05, 1.26) | 1.21 (1.07, 1.37) | 0.0001  | 1.07 (1.04, 1.11)                           |
| Cancer Mortality                                                          | 1.0      | 0.97 (0.93, 1.02) | 1.02 (0.97, 1.07) | 1.04 (0.97, 1.11) | 1.04 (0.95, 1.15) | 0.08    | 1.02 (0.99, 1.04)                           |
| <b>8-year lagged analysis</b>                                             |          |                   |                   |                   |                   |         |                                             |
| All-cause Mortality                                                       | 1.0      | 0.96 (0.93, 0.99) | 1.01 (0.97, 1.04) | 1.02 (0.96, 1.07) | 1.11 (1.04, 1.20) | 0.0002  | 1.05 (1.02, 1.07)                           |
| CVD Mortality                                                             | 1.0      | 0.92 (0.86, 0.99) | 0.95 (0.89, 1.02) | 1.01 (0.90, 1.14) | 1.09 (0.91, 1.29) | 0.15    | 1.05 (1.00, 1.10)                           |
| Cancer Mortality                                                          | 1.0      | 0.98 (0.93, 1.04) | 1.01 (0.95, 1.06) | 1.00 (0.91, 1.10) | 1.08 (0.95, 1.23) | 0.13    | 1.04 (1.00, 1.07)                           |
| <b>Adjusting for AHEI instead of foods</b>                                |          |                   |                   |                   |                   |         |                                             |
| All-cause Mortality                                                       | 1.0      | 1.00 (0.97, 1.03) | 1.04 (1.01, 1.07) | 1.12 (1.07, 1.17) | 1.19 (1.12, 1.27) | <0.0001 | 1.07 (1.05, 1.09)                           |
| CVD Mortality                                                             | 1.0      | 1.06 (0.99, 1.12) | 1.09 (1.03, 1.16) | 1.18 (1.07, 1.30) | 1.30 (1.14, 1.49) | <0.0001 | 1.09 (1.06, 1.14)                           |
| Cancer Mortality                                                          | 1.0      | 1.03 (0.98, 1.08) | 1.05 (1.00, 1.11) | 1.11 (1.03, 1.20) | 1.15 (1.03, 1.27) | 0.001   | 1.04 (1.01, 1.07)                           |
| <b>ASB</b>                                                                |          |                   |                   |                   |                   |         |                                             |

| <b>Simple update without stopping updating diet with chronic diseases</b> |     |                   |                   |                   |                   |      |                   |
|---------------------------------------------------------------------------|-----|-------------------|-------------------|-------------------|-------------------|------|-------------------|
| All-cause Mortality                                                       | 1.0 | 0.94 (0.91, 0.97) | 0.96 (0.93, 0.99) | 0.94 (0.90, 0.98) | 1.00 (0.95, 1.05) | 0.51 | 1.00 (0.98, 1.01) |
| CVD Mortality                                                             | 1.0 | 0.91 (0.85, 0.98) | 0.94 (0.89, 1.00) | 0.96 (0.87, 1.06) | 1.01 (0.90, 1.13) | 0.93 | 1.01 (0.98, 1.05) |
| Cancer Mortality                                                          | 1.0 | 0.98 (0.92, 1.03) | 0.96 (0.92, 1.00) | 0.88 (0.81, 0.94) | 0.95 (0.87, 1.03) | 0.01 | 0.96 (0.94, 0.98) |
| <b>Cumulative Average Intake</b>                                          |     |                   |                   |                   |                   |      |                   |
| All-cause Mortality                                                       | 1.0 | 0.94 (0.91, 0.97) | 0.93 (0.91, 0.95) | 0.94 (0.90, 0.95) | 1.03 (0.98, 1.08) | 0.71 | 1.02 (1.00, 1.03) |
| CVD Mortality                                                             | 1.0 | 0.90 (0.84, 0.96) | 0.90 (0.85, 0.95) | 0.92 (0.84, 1.00) | 1.12 (1.00, 1.24) | 0.15 | 1.04 (1.00, 1.07) |
| Cancer Mortality                                                          | 1.0 | 0.90 (0.85, 0.95) | 0.88 (0.84, 0.92) | 0.89 (0.83, 0.95) | 0.91 (0.84, 1.00) | 0.03 | 0.98 (0.96, 1.01) |
| <b>Baseline Intake</b>                                                    |     |                   |                   |                   |                   |      |                   |
| All-cause Mortality                                                       | 1.0 | 0.95 (0.92, 0.98) | 0.94 (0.91, 0.97) | 0.95 (0.92, 0.99) | 0.99 (0.95, 1.04) | 0.76 | 1.01 (0.99, 1.02) |
| CVD Mortality                                                             | 1.0 | 0.92 (0.85, 0.98) | 0.98 (0.93, 1.04) | 0.97 (0.89, 1.05) | 1.02 (0.92, 1.12) | 0.68 | 1.02 (0.99, 1.06) |
| Cancer Mortality                                                          | 1.0 | 0.95 (0.90, 1.01) | 0.91 (0.86, 0.95) | 0.94 (0.88, 1.00) | 0.93 (0.86, 1.00) | 0.03 | 0.98 (0.96, 1.00) |
| <b>8-year lagged analysis</b>                                             |     |                   |                   |                   |                   |      |                   |
| All-cause Mortality                                                       | 1.0 | 0.96 (0.93, 0.99) | 0.94 (0.91, 0.97) | 0.93 (0.88, 0.97) | 1.04 (0.98, 1.09) | 0.49 | 1.02 (1.00, 1.03) |
| CVD Mortality                                                             | 1.0 | 0.96 (0.89, 1.05) | 0.90 (0.84, 0.97) | 0.90 (0.80, 1.00) | 1.10 (0.98, 1.24) | 0.25 | 1.04 (1.00, 1.08) |
| Cancer Mortality                                                          | 1.0 | 0.96 (0.90, 1.02) | 0.93 (0.88, 0.98) | 0.91 (0.84, 0.98) | 1.01 (0.93, 1.10) | 0.83 | 1.01 (0.99, 1.04) |
| <b>Adjusting for AHEI instead of foods</b>                                |     |                   |                   |                   |                   |      |                   |
| All-cause Mortality                                                       | 1.0 | 0.96 (0.93, 0.98) | 0.97 (0.94, 1.00) | 0.98 (0.94, 1.02) | 1.07 (1.02, 1.12) | 0.02 | 1.02 (1.01, 1.04) |
| CVD Mortality                                                             | 1.0 | 0.93 (0.87, 1.00) | 0.95 (0.89, 1.00) | 1.02 (0.93, 1.11) | 1.12 (1.02, 1.24) | 0.03 | 1.04 (1.01, 1.07) |
| Cancer Mortality                                                          | 1.0 | 1.01 (0.96, 1.06) | 0.99 (0.94, 1.03) | 1.00 (0.93, 1.06) | 1.03 (0.96, 1.12) | 0.64 | 1.00 (0.98, 1.03) |

Adjusted for: age, smoking, alcohol intake, postmenopausal hormone use (NHS), physical activity, family history of diabetes, family history of mi, family history of cancer, multivitamin use, ethnicity, aspirin use, baseline history of hypertension and hypercholesterolemia, intakes of whole grains, fruit, vegetables, red and processed meat, total energy and BMI. ASB and SSB were mutually adjusted. AHEI, alternative healthy eating index.

**Supplemental Table 4:** Total and Cause-specific Mortality According to Intake of Sugar- Sweetened Beverages (SSB) and Artificially Sweetened Beverages (ASB) based on data of the Nurses' Health Study (NHS) and Health Professionals Follow-up study (HPFS) using four categories of intake.

|                  | ≤1/w | 2-6/wk            | 1 to <2/d         | ≥ 2/d             | P trend | HR (95% CI) per 1 serving per day increment |
|------------------|------|-------------------|-------------------|-------------------|---------|---------------------------------------------|
| <b>SSB</b>       |      |                   |                   |                   |         |                                             |
| <b>NHS</b>       |      |                   |                   |                   |         |                                             |
| Total mortality  | 1.0  | 1.03 (1.00, 1.07) | 1.13 (1.07, 1.19) | 1.24 (1.15, 1.33) | <0.0001 | 1.08 (1.05, 1.10)                           |
| CVD mortality    | 1.0  | 1.08 (0.99, 1.17) | 1.19 (1.05, 1.35) | 1.35 (1.14, 1.59) | <0.0001 | 1.11 (1.06, 1.16)                           |
| Cancer mortality | 1.0  | 1.00 (0.95, 1.06) | 1.06 (0.96, 1.16) | 1.13 (1.00, 1.28) | 0.02    | 1.03 (1.00, 1.07)                           |
| <b>HPFS</b>      |      |                   |                   |                   |         |                                             |
| Total mortality  | 1.0  | 1.07 (1.03, 1.12) | 1.16 (1.08, 1.25) | 1.15 (1.02, 1.29) | <.0001  | 1.07 (1.03, 1.10)                           |
| CVD mortality    | 1.0  | 1.07 (0.99, 1.15) | 1.15 (1.00, 1.33) | 1.18 (0.94, 1.47) | 0.02    | 1.07 (1.01, 1.14)                           |
| Cancer mortality | 1.0  | 1.12 (1.04, 1.20) | 1.21 (1.06, 1.38) | 1.17 (0.95, 1.43) | 0.003   | 1.08 (1.03, 1.15)                           |
| <b>Pooled</b>    |      |                   |                   |                   |         |                                             |
| Total mortality  | 1.0  | 1.05 (1.03, 1.08) | 1.14 (1.09, 1.19) | 1.21 (1.14, 1.28) | <0.0001 | 1.07 (1.05, 1.09)                           |
| CVD mortality    | 1.0  | 1.08 (1.02, 1.14) | 1.17 (1.07, 1.29) | 1.29 (1.13, 1.47) | <0.0001 | 1.10 (1.06, 1.14)                           |
| Cancer mortality | 1.0  | 1.05 (1.00, 1.10) | 1.10 (1.02, 1.19) | 1.14 (1.03, 1.27) | 0.0005  | 1.05 (1.02, 1.08)                           |
| <b>ASB</b>       |      |                   |                   |                   |         |                                             |
| <b>NHS</b>       |      |                   |                   |                   |         |                                             |
| Total mortality  | 1.0  | 0.95 (0.92, 0.99) | 0.98 (0.93, 1.03) | 1.10 (1.04, 1.17) | 0.01    | 1.03 (1.01, 1.05)                           |
| CVD mortality    | 1.0  | 0.92 (0.84, 1.00) | 0.96 (0.86, 1.08) | 1.17 (1.03, 1.32) | 0.07    | 1.04 (1.00, 1.08)                           |
| Cancer mortality | 1.0  | 0.95 (0.89, 1.00) | 0.97 (0.90, 1.05) | 1.04 (0.95, 1.14) | 0.53    | 1.01 (0.98, 1.04)                           |
| <b>HPFS</b>      |      |                   |                   |                   |         |                                             |
| Total mortality  | 1.0  | 1.01 (0.97, 1.05) | 1.00 (0.93, 1.07) | 1.00 (0.92, 1.09) | 0.91    | 1.01 (0.98, 1.03)                           |
| CVD mortality    | 1.0  | 0.99 (0.92, 1.08) | 1.11 (0.98, 1.26) | 1.06 (0.91, 1.23) | 0.29    | 1.03 (0.98, 1.07)                           |
| Cancer mortality | 1.0  | 1.03 (0.95, 1.11) | 0.99 (0.88, 1.13) | 0.96 (0.82, 1.11) | 0.51    | 0.99 (0.95, 1.03)                           |
| <b>Pooled</b>    |      |                   |                   |                   |         |                                             |

|                  |     |                   |                   |                   |      |                   |
|------------------|-----|-------------------|-------------------|-------------------|------|-------------------|
| Total mortality  | 1.0 | 0.98 (0.96, 1.01) | 0.99 (0.95, 1.03) | 1.08 (1.03, 1.13) | 0.01 | 1.03 (1.01, 1.04) |
| CVD mortality    | 1.0 | 0.96 (0.91, 1.02) | 1.03 (0.95, 1.13) | 1.14 (1.03, 1.26) | 0.02 | 1.04 (1.01, 1.07) |
| Cancer mortality | 1.0 | 0.99 (0.94, 1.03) | 0.99 (0.93, 1.06) | 1.03 (0.96, 1.11) | 0.60 | 1.01 (0.98, 1.03) |

Adjusted for: age, smoking, alcohol intake, postmenopausal hormone use (NHS), physical activity, family history of diabetes, family history of mi, family history of cancer, multivitamin use, ethnicity, aspirin use, baseline history of hypertension and hypercholesterolemia, intakes of whole grains, fruit, vegetables, red and processed meat, total energy and BMI. ASB and SSB were mutually adjusted.



**Supplemental Figure 1:** Mean intake of SSB (panel A-solid lines)) and ASB (panel B-dashed lines) in the Nurses' Health Study (NHS) and Health Professionals Follow-up Study (HPFS) by Food Frequency Questionnaire (FFQ)

Panel A

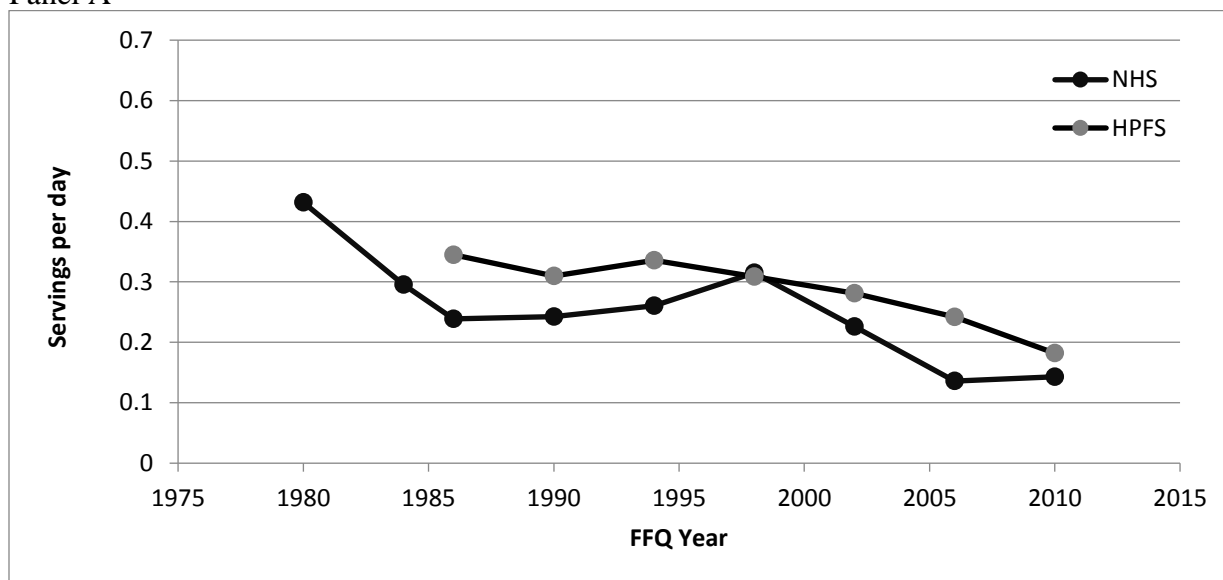

Panel B

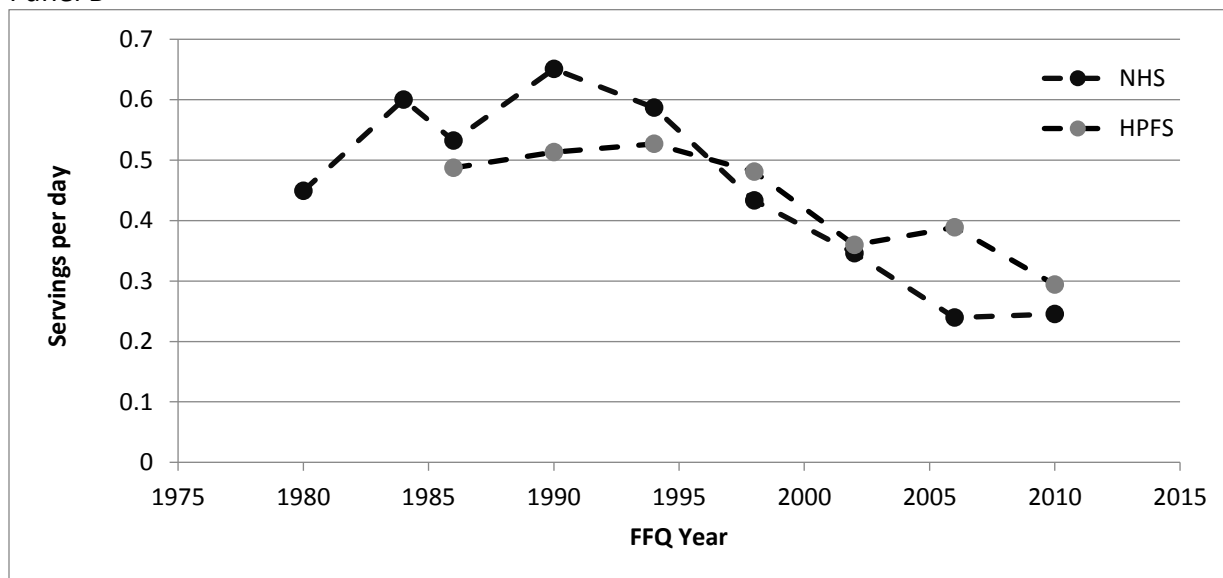

Supplement: NIHMS1520746-supplement-Supplemental_Publication_Material.pdf [file NIHMS1520746-supplement-Supplemental_Publication_Material.pdf]
